# Supplementary material for: Fluorescent carbon dots with highly negative charges as a sensitive probe for real-time monitoring of bacterial viability
Source: Royal Society of Chemistry journal article supplement (doi:10.1039/c7tb01092c), 2017-01-01
Supplement: c7tb01092c1.pdf [file c7tb01092c1.pdf]

## Supplementary Information

# Fluorescent carbon dots with highly negative charge as sensitive probe for real-time monitoring of bacterial viability

*Yuxiang Song,<sup>‡a</sup> Hao Li,<sup>‡a</sup> Fang Lu,<sup>‡c</sup> Huibo Wang,<sup>a</sup> Mengling Zhang,<sup>a</sup> Jinjing Yang,<sup>b</sup>*

*Jian Huang,<sup>\*b</sup> Hui Huang,<sup>\*a</sup> Yang Liu,<sup>\*a</sup> and Zhenhui Kang<sup>\*a</sup>*

<sup>a</sup> Jiangsu Key Laboratory for Carbon-Based Functional Materials & Devices, Institute of Functional Nano & Soft Materials (FUNSOM), Soochow University, 199 Ren'ai Road, Suzhou, 215123, Jiangsu, PR China.

<sup>b</sup> School of Biology & Basic Medical Sciences, Soochow University, 199 Ren'ai Road, Suzhou, 215123, Jiangsu, PR China.

<sup>c</sup> School of Basic Medical Sciences, Beijing University of Chinese Medicine, Beijing 100029, China.

### Corresponding Author

\* E-mail: zhkang@suda.edu.cn; yangl@suda.edu.cn; hhuang0618@suda.edu.cn

\* E-mail: huangjian79@suda.edu.cn

### Author Contributions

‡ These authors contributed equally to this work.

## **1. Experimental Section**

### **1.1 Synthesis of non-doped carbon dots<sup>S1</sup>**

2 g citric acid was put into a 5 mL beaker and heated to 200 °C for 30 min. The obtained orange liquid was added drop by drop into 100 mL of 10 mg/mL NaOH solution under vigorous stirring. After neutralized to pH 7.0 with NaOH, the aqueous solution of non-doped carbon dots was obtained.

### **1.2 Synthesis of unary atom-doped carbon dots<sup>S2,S3</sup>**

The nitrogen-doped carbon dots (NCDs) were synthesized by hydrothermal treatment of CDs (obtained by the developed electrochemical etching method).

### **1.3 Synthesis of binary atom-doped carbon dots<sup>S4</sup>**

The nitrogen and sulfur co-doped carbon dots (NSCDs) were synthesized according to a simple hydrothermal method. Briefly, 2 g of citric acid monohydrate and 2 g L-cysteine were mixed within 80 mL deionized water under continuous stirring. The mixture was heated hydrothermally in an autoclave at 80 °C for 72 hours after bubbling N<sub>2</sub> for 30 min. The resulting yellowish-brown solution was cooled to room temperature and filtered with 0.22 μm membranes. To further purify the as-prepared NSCDs, the filtrate was subjected to dialysis against pure water through a dialysis bag (500–1000 MWCO).

### **1.4 Surface passivation of NPSCDs**

Concentrated nitric acid (14.4 mol/L) was added into the solution of NPSCDs (1:10). The mixture was heated at 60 °C for 30 min. The obtained solution was then dialyzed for 1 day (MWCO 1000) to remove unreacted nitric acid.

## 2. Additional Figures

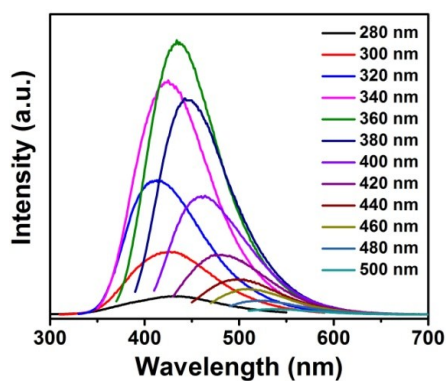

**Figure S1.** PL spectra of NPSCDs with excitation wavelengths from 280 nm to 500 nm with increment of 20 nm.

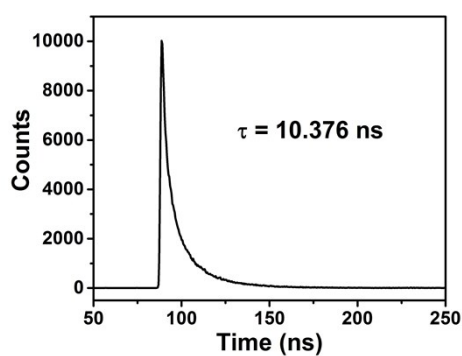

**Figure S2.** Fluorescence decay curve of NPSCDs. (300 nm excitation, monitored with 425 nm narrow bandpass filter)

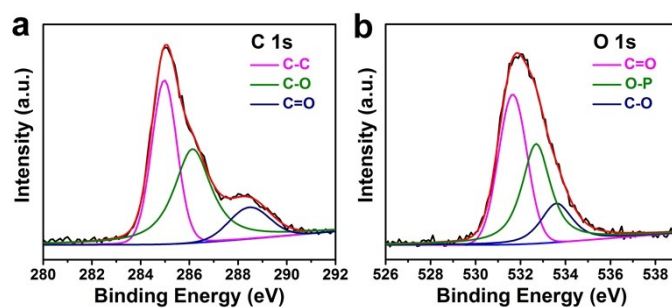

**Figure S3.** The high-resolution XPS spectra of (a) C 1s and (b) O 1s.

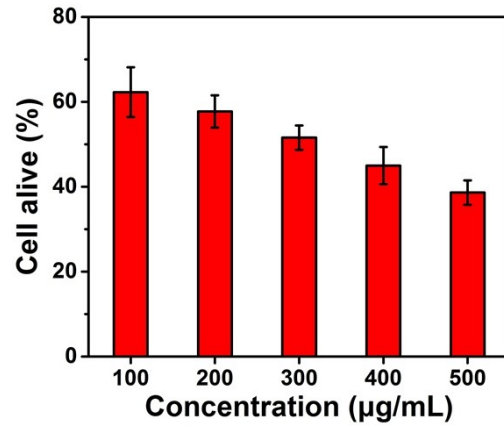

**Figure S4.** Absorbance-based viability assay to HeLa cells incubated with different concentrations of propidium iodide for 2 h.

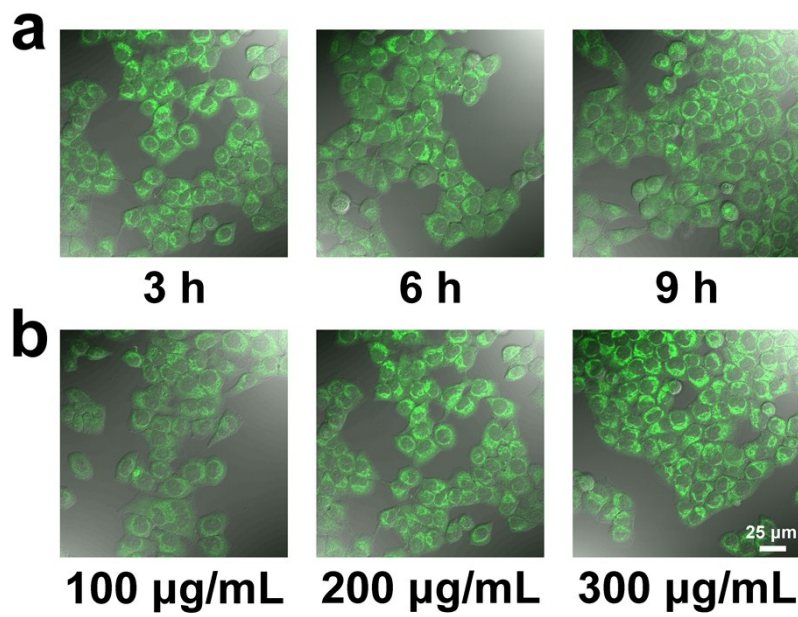

**Figure S5.** HeLa cell imaging with different (a) incubation time (200 µg/mL) and (b) concentration of NPSCDs (3 h).

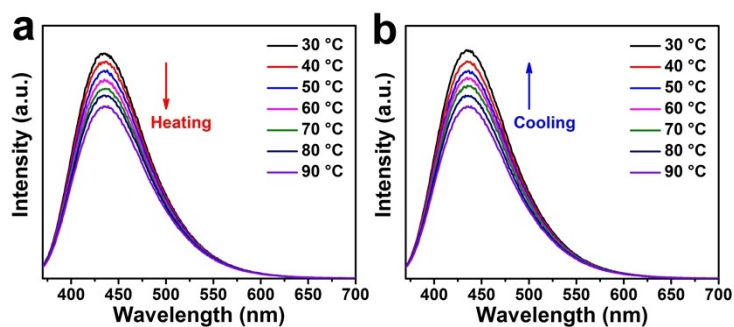

**Figure S6.** PL spectra of NPSCDs during (a) heating and (b) cooling processes from 30 °C to 90 °C with increment of 10 °C.

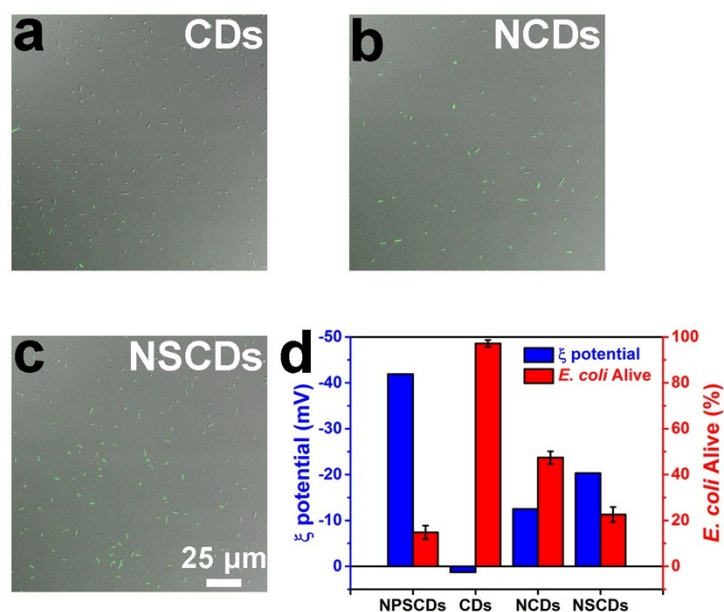

**Figure S7.** CLSM images of *E. coli* (60 °C for 15 min) incubated with (a) CDs, (b) NCDs and (c) NSCDs. (d)  $\zeta$  potential of the four types of CDs (Blue) and calculated *E. coli* alive rate (red).

## References

- S1. Y. Q. Dong, J. W. Shao, C. Q. Chen, H. Li, R. X. Wang, Y. W. Chi, X. M. Lin and G. N. Chen, *Carbon*, 2012, **50**, 4738–4743.
- S2. J. Liu, S. Y. Zhao, C. X. Li, M. M. Yang, Y. M. Yang, Y. Liu, Y. Lifshitz, S. T.

Lee and Z. H. Kang, *Adv. Energy Mater.*, 2016, 1502039

S3. H. Ming, Z. Ma, Y. Liu, K. M. Pan, H. Yu, F. Wang and Z. H. Kang, *Dalton Trans.*, 2012, **41**, 9526–9531.

S4. M. M. Han, L. P. Wang, L. Bai, Y. J. Zhou, Y. Sun, H. Li, H. Huang, Y. Liu and Z. H. Kang, *J. Mater. Chem. B*, 2017, **5**, 3964–3969.
